# Supplementary material
Source: publisher site journal article supplement (https://www.dovepress.com/article/608659)
Supplement: Supplementary file 1 [file Supplementary%20materials.docx]

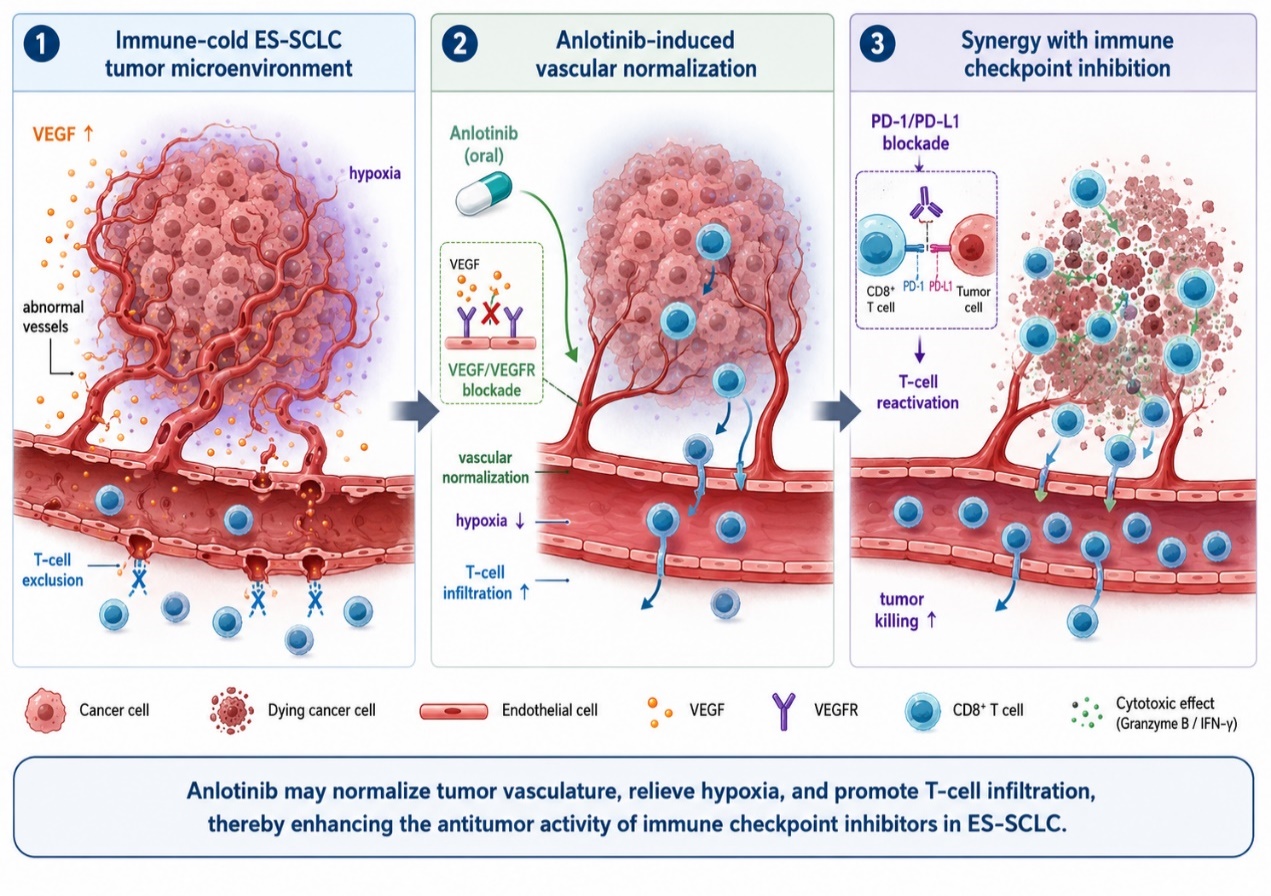


**Supplementary Figure S1. Synergistic mechanism of anlotinib plus immune checkpoint inhibitors in ES-SCLC**

Schematic illustration of the potential synergistic mechanism of anlotinib combined with immune checkpoint inhibitors in extensive-stage small-cell lung cancer (ES-SCLC). In an immune-cold tumor microenvironment, aberrant tumor vasculature, increased VEGF signaling, and hypoxia may limit CD8⁺ T-cell infiltration. Anlotinib may inhibit VEGF/VEGFR signaling and promote tumor vascular normalization, thereby reducing hypoxia and facilitating CD8⁺ T-cell entry into the tumor microenvironment. Subsequent PD-1/PD-L1 blockade may reactivate antitumor T-cell responses, enhance cytotoxic activity, and shift the tumor microenvironment from an immune-cold state toward a more immune-active state.
